# Supplementary material for: Effects of Green Lettuce Leaf Extract on Sleep Disturbance Control in Oxidative Stress-Induced Invertebrate and Vertebrate Models
Source: MDPI journal article supplement (doi:10.3390/antiox10060970), 2021-06-17
Supplement: s1 [file s1]

# Supplementary Materials

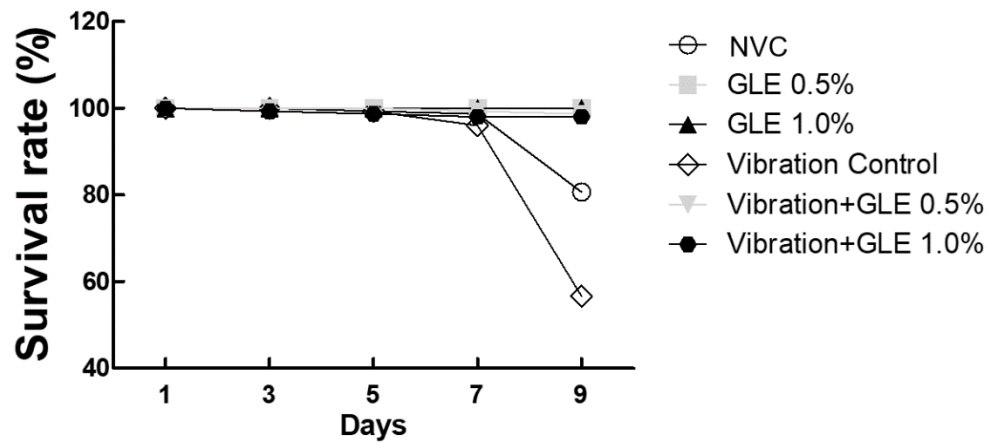

**Figure S1.** Effects of GLE (green lettuce leaf extract) on survival rate by vibration stress in fruit flies. Experimental groups include the no-vibration-stress control group (NVC), control group (stress-induced vibration), and GLE (green lettuce leaf extract)-treated groups with or without stress (0.5 and 1.0%).
